# Supplementary material
Source: Springer Nature journal article supplement (https://www.springermedizin.de/resource/supplementary/13012_2010_276_MOESM4_ESM.pdf/9629614)

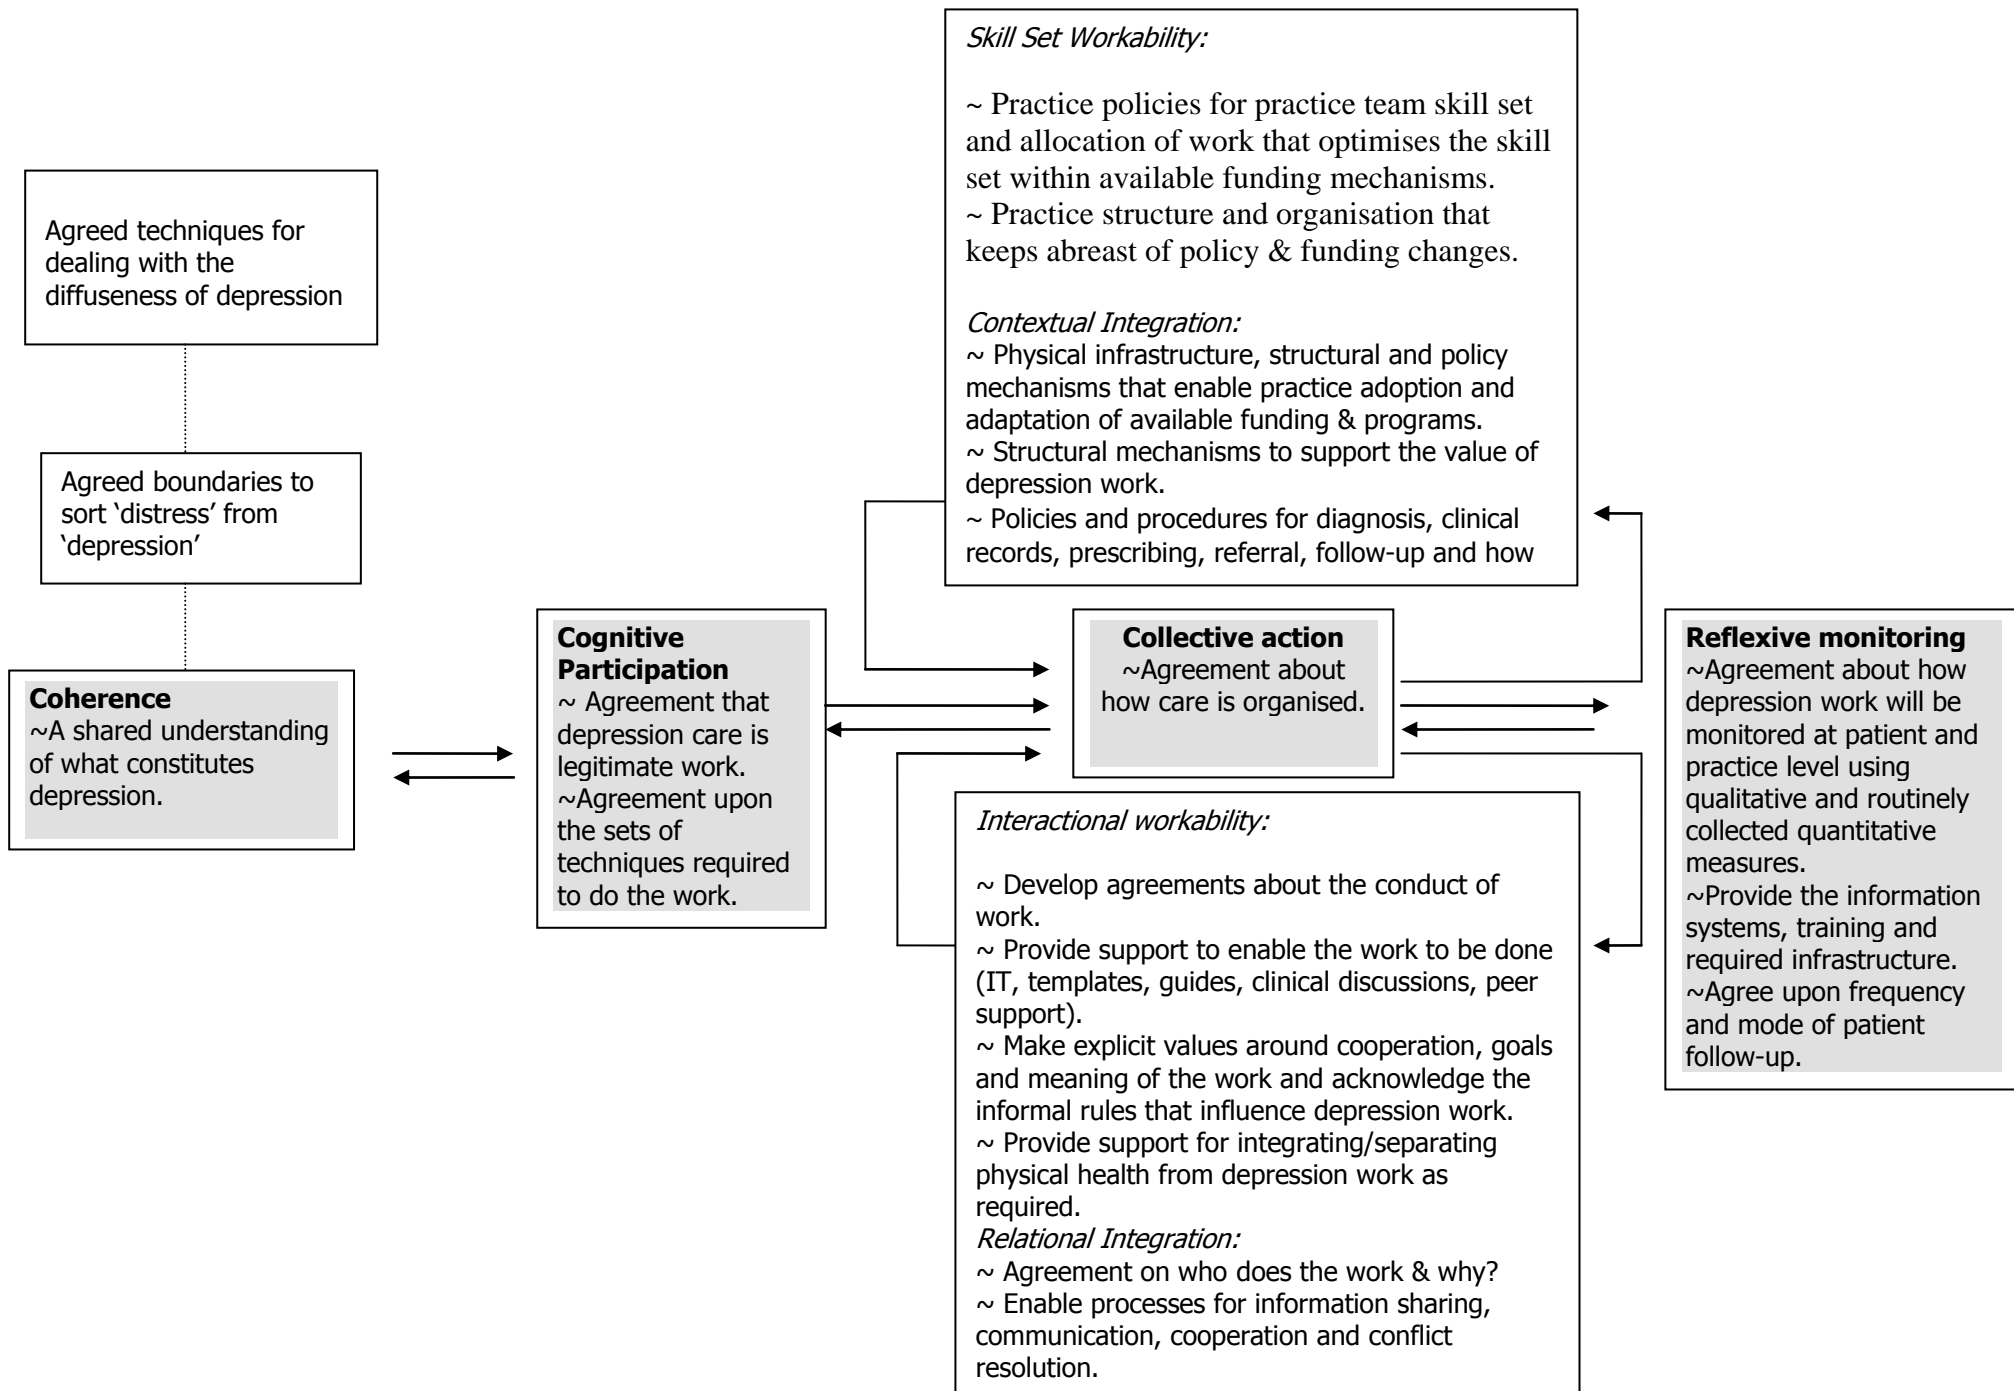

Supplement: MOESM4 [file 9629614]
